# Supplementary material for: S-phase-independent silencing establishment in Saccharomyces cerevisiae
Source: eLife journal article supplement (doi:10.7554/elife.58910), 2020-07-20
Supplement: supp [file elife-58910-supp-v1.zip]

Archive with 15 entries (15 files):
- elife_poa_e58910_Figure_1_figure_supplement_1.ai
- elife_poa_e58910_Figure_1_figure_supplement_2.ai
- elife_poa_e58910_Figure_2_figure_supplement_1.ai
- elife_poa_e58910_Figure_2_figure_supplement_2.ai
- elife_poa_e58910_Figure_3_figure_supplement_1.ai
- elife_poa_e58910_Figure_3_figure_supplement_2.ai
- elife_poa_e58910_Figure_3_figure_supplement_3.ai
- elife_poa_e58910_Figure_4_figure_supplement_1.ai
- elife_poa_e58910_Figure_4_figure_supplement_2.ai
- elife_poa_e58910_Figure_5_figure_supplement_1.ai
- elife_poa_e58910_Transparent_Reporting_File.pdf
- elife_poa_e58910_Source_code_1.py
- elife_poa_e58910_Source_code_2.py
- elife_poa_e58910_Supplementary_file_1.xlsx
- elife_poa_e58910_Figure_5_source_data_1.xlsx
