# Supplementary material for: S-phase-independent silencing establishment in Saccharomyces cerevisiae
Source: eLife journal article supplement (doi:10.7554/elife.58910), 2020-07-20
Supplement: supp [file elife-58910-supp-v1.zip › elife_poa_e58910_Figure_5_source_data_1.xlsx]

## Sheet: Figure 5--source data 1
Figure 5—Source Data 1: P-values for comparisons displayed in Figure 5
Comparisons of a1/ALG9	p-value (Two-tailed t-Test)	N (for mutant)
WT_to_dot1∆	8.01011e-07	4
WT_to_sas2∆	0.000236141	3
WT_to_rtt109∆	1.48236e-05	3
WT_to_sas2∆dot1∆	9.12947e-07	3
WT_to_rtt109∆dot1∆	9.31269e-07	3
WT_to_sas2∆rtt109∆	0.000105524	2
WT_to_sas2∆rtt109∆dot1∆	0.000110527	2
dot1∆_to_sas2∆dot1∆	0.00389089
dot1∆_to_rtt109∆dot1∆	0.00864874
dot1∆_to_sas2∆rtt109∆dot1∆	0.704979
Comparisons of α1/ALG9	p-value (Two-tailed t-Test)	N (for mutant)
WT_to_dot1∆	0.000862237	2
WT_to_sas2∆	0.0194981	2
WT_to_rtt109∆	0.00997927	2
WT_to_sas2∆dot1∆	0.00576812	2
WT_to_rtt109∆dot1∆	0.000196342	2
dot1∆_to_sas2∆dot1∆	0.188924
dot1∆_to_rtt109∆dot1∆	0.0277869
