# Supplementary material for: S-phase-independent silencing establishment in Saccharomyces cerevisiae
Source: eLife journal article supplement (doi:10.7554/elife.58910), 2020-07-20
Supplement: supp [file elife-58910-supp-v1.zip › elife_poa_e58910_Source_code_2.py]

import sys
import os
import string

#This program normalizes a bedgraph to the non-heterochromatin genome-wide median or mean.
#Input is a bedgraph file generated by generate_bedgraph.py
#It takes x.bedgraph as an argument from the command line and generates a file called x_mean_normalized.bedgraph and/or x_median_normalized.bedgraph
#Bedgraphs should be passed as absolute paths to ensure that the normalized bedgraph is saved in the same folder as the original.
#Example call: python normalize_bedgraph.py /home/janedoe/sequencing_data/sample_a.bedgraph

##################################################
#TOGGLE HERE BETWEEN MEAN AND MEDIAN CALCULATIONS!
want_median = bool(1)
want_mean = bool(0)

##################################################

chromosome_lengths = {"I":230218,"II":813184,"III":316620,"IV":1531933,"V":576874,"VI":270161,"VII":1090940,"VIII":562643,"IX":439888,
"X":745751,"XI":666816,"XII":1078177,"XIII":924431,"XIV":784333,"XV":1091291,"XVI":948066}

#The three functions (gen_mean, write_norm, and get_median) are defined first, with the code being called at the bottom

#If mean-noramlizing, calculates mean coverage by calculating total coverage across non-heterochromatin non-mitochondrial
#genome and dividing by number of bases
def get_mean(file_in_string):
	file_in = open(file_in_string, "r")
	coverage = 0
	total_bases = 12071326 - 316620 - (20000 * 2 * 15)
	#total_bases = total chromosomal genome size - chrIII size - subtelomeres on all non-chrIII chromosomes
	file_in.readline()
	lines = file_in.readlines()
	for line in lines:
		chrom = line.split()[0]
		loc = int(line.split()[1])
		is_rDNA = (chrom == "XII") and (loc > 450000) and (loc < 500000)
		if not(chrom == "III") and not(chrom == "MT") and not(is_rDNA)  and loc > 20000 and loc < chromosome_lengths[chrom]-20000:
			coverage = coverage + float(line.split()[3])
	mean = coverage/total_bases
	file_in.close()
	return mean

#This function normalizes the coverage values on each line of the bedgraph file and writes to a new file identical to
#the input file, but with coverage normalized 
def write_norm(file_in_string,file_out_string, val, mean_or_median):
	file_in = open(file_in_string, "r")
	file_out = open(file_out_string, "w")
	
	#Keeps first line of input bedgraph file
	file_out.write(file_in.readline()+ "\n")
	file_out.write("#" + mean_or_median + "Genome coverage:" + str(val) + "\n")
	lines = file_in.readlines()
	for line in lines:
		line_out_val=float(line.split()[3])/val
		line_out=line.split()[0] + "\t" + line.split()[1] + "\t" + line.split()[2] + "\t" + str(line_out_val) + "\n"
		file_out.write(line_out)
	file_out.close()
	file_in.close()

#If median-normalizing, I create a list of all coverage values (list_of_coverages) and fill it with each coverage value
#from the input bedgraph file. This list is sorted and the median value is the mid-point of the sorted list
def get_median(file_in_string):
	file_in = open(file_in_string, "r")
	total_bases = 12071326 - 316620 - (20000 * 2 * 15)
	#total_bases = total chromosomal genome size - chrIII size - subtelomeres on all non-chrIII chromosomes
	file_in.readline()
	lines = file_in.readlines()
	list_of_coverages=[]
	
	#The "covered" variable is a way to count all the bases with any coverage, and then calculate the number
	#of bases with zero coverage, and include thosse zero-coverage bases in the median calculation, since
	#positions with zero coverage will not be explicitly listed in the input bedgraph file
	covered = 0

	for line in lines:
		chrom = line.split()[0]
		loc = int(line.split()[1])
		coverage = float(line.split()[3])
		if not(chrom == "III") and not(chrom == "MT") and loc > 20000 and loc < chromosome_lengths[chrom]-20000:
			covered = covered + 1
			list_of_coverages.append(coverage)

	#Adds 0 for every position that had no coverage value
	for i in range(total_bases-covered):
		list_of_coverages.append(0.0)

	list_of_coverages.sort()
	median =list_of_coverages[len(list_of_coverages)/2]
	return median

#Can call on multiple bedgraph files at once by listing them as arguments from the command line
for i in range(1,len(sys.argv)):
	file_in_string= sys.argv[i]

	#Decision of whether to calculate mean-normalized, median-normalized, or both is toggled at the top
	# of this code by chaing the values of the booleans "want_mean" and "want_median"
	if want_mean:
		file_out_string= sys.argv[i].split(".bedgraph")[0] + "_mean_normalized.bedgraph"
		mean = get_mean(file_in_string)
		write_norm(file_in_string, file_out_string, mean, "Mean")
	if want_median:
		file_out_string= sys.argv[i].split(".bedgraph")[0] + "_median_normalized.bedgraph"
		median = get_median(file_in_string)
		write_norm(file_in_string, file_out_string, median, "Median")
	print sys.argv[i] + " done"
